# Supplementary material for: Folic acid functionalization for targeting self-assembled paclitaxel-based nanoparticles
Source: Royal Society of Chemistry journal article supplement (doi:10.1039/d2ra06306a), 2022-01-01

# Supplementary Information

## Folic Acid Functionalization For Targeting Self-Assembled Paclitaxel-Based Nanoparticles

Eleonora Colombo,<sup>a,b</sup> Davide Andrea Coppini,<sup>a</sup> Simone Maculan,<sup>a</sup> Pierfausto Seneci,<sup>a</sup> Benedetta Santini,<sup>a</sup> Filippo Testa,<sup>c</sup> Lucia Salvioni,<sup>c</sup> Giovanni Maria Vanacore,<sup>d</sup> Miriam Colombo,<sup>c</sup> and Daniele Passarella\*<sup>a</sup>

<sup>a</sup> Dipartimento di Chimica, Università degli Studi di Milano, Via Golgi 19, 20133 Milano, Italy.

E-mail: [daniele.passarella@unimi.it](mailto:daniele.passarella@unimi.it),

<sup>b</sup> Ann Romney Center for Neurologic Diseases, Department of Neurology, Brigham and Women's Hospital and Harvard Medical School, Boston, MA 02115, USA

<sup>c</sup> Dipartimento di Biotecnologie e Bioscienze - Università degli Studi di Milano Bicocca - Piazza della Scienza 2, 20126 Milano, Italy

<sup>d</sup> Dipartimento di Scienza dei Materiali - Università degli Studi di Milano Bicocca - Via Roberto Cozzi 55, 20125, Milano, Italy

## Sommario

|                                                 |    |
|-------------------------------------------------|----|
| $^1\text{H}$ and $^{13}\text{C}$ Spectra .....  | 3  |
| $^1\text{H}$ NMR of 3 .....                     | 3  |
| $^1\text{H}$ NMR of 5 .....                     | 4  |
| $^1\text{H}$ and $^{13}\text{C}$ NMR of 1 ..... | 5  |
| $^1\text{H}$ NMR of 8 .....                     | 6  |
| $^1\text{H}$ and $^{13}\text{C}$ NMR of 9.....  | 7  |
| $^1\text{H}$ and $^{13}\text{C}$ NMR of 10..... | 8  |
| $^1\text{H}$ and $^{13}\text{C}$ NMR of 11..... | 9  |
| $^1\text{H}$ and $^{13}\text{C}$ NMR of 12..... | 10 |
| $^1\text{H}$ NMR of 21 .....                    | 11 |
| $^1\text{H}$ NMR of 22 .....                    | 11 |
| $^1\text{H}$ NMR of 18 .....                    | 12 |
| $^1\text{H}$ NMR of 17 .....                    | 12 |
| $^1\text{H}$ NMR of 16 .....                    | 13 |
| $^1\text{H}$ NMR of 15 .....                    | 13 |
| $^1\text{H}$ and $^{13}\text{C}$ NMR of 14..... | 14 |
| $^1\text{H}$ and $^{13}\text{C}$ NMR of 2.....  | 15 |

# <sup>1</sup>H and <sup>13</sup>C Spectra

## <sup>1</sup>H NMR of compound 3

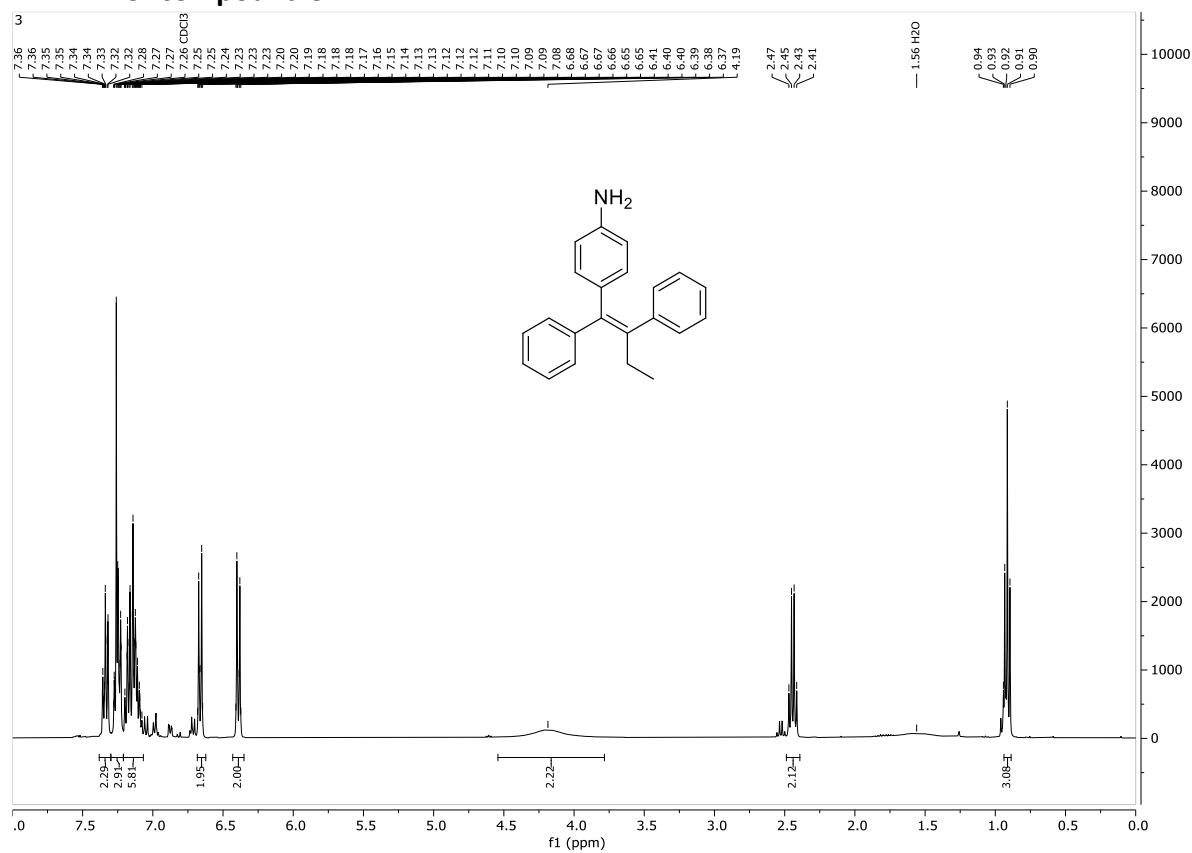

# <sup>1</sup>H NMR of 5

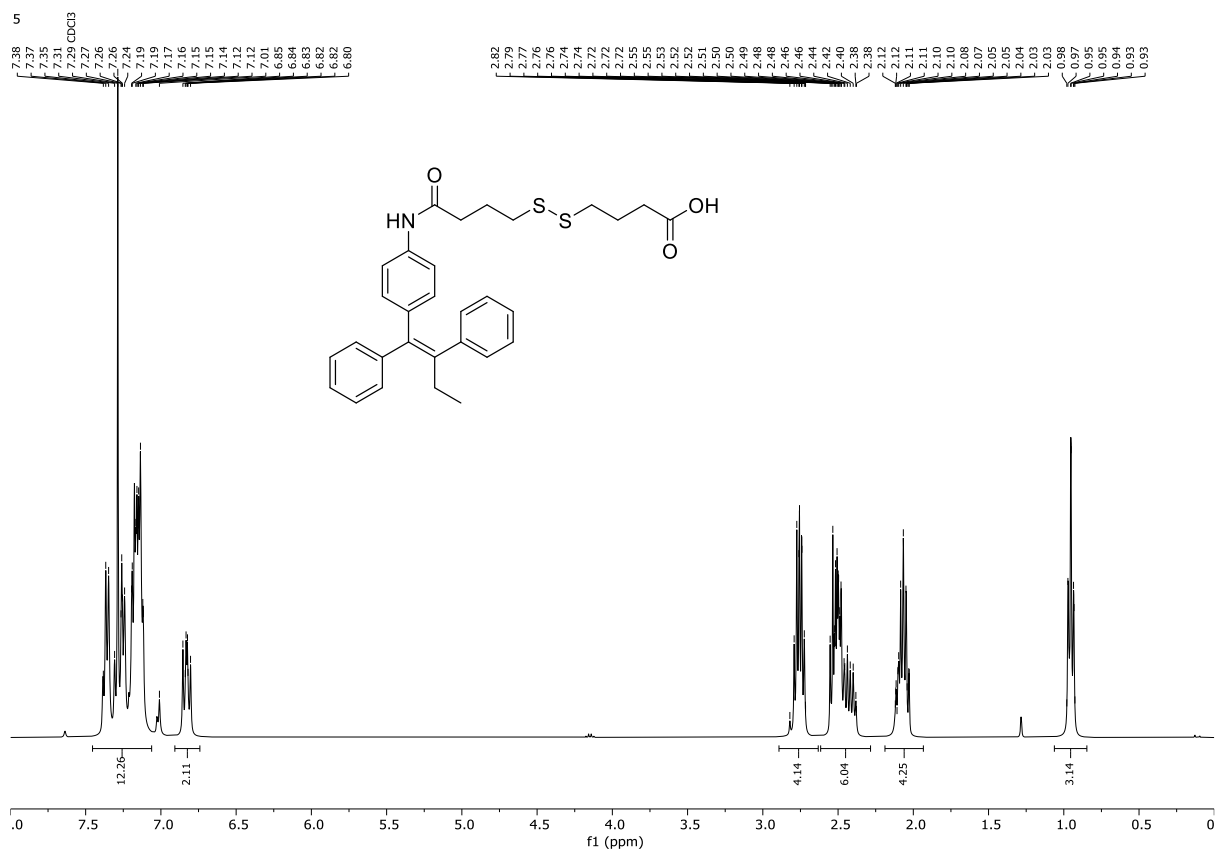

# <sup>1</sup>H and <sup>13</sup>C-APT NMR of compound 1

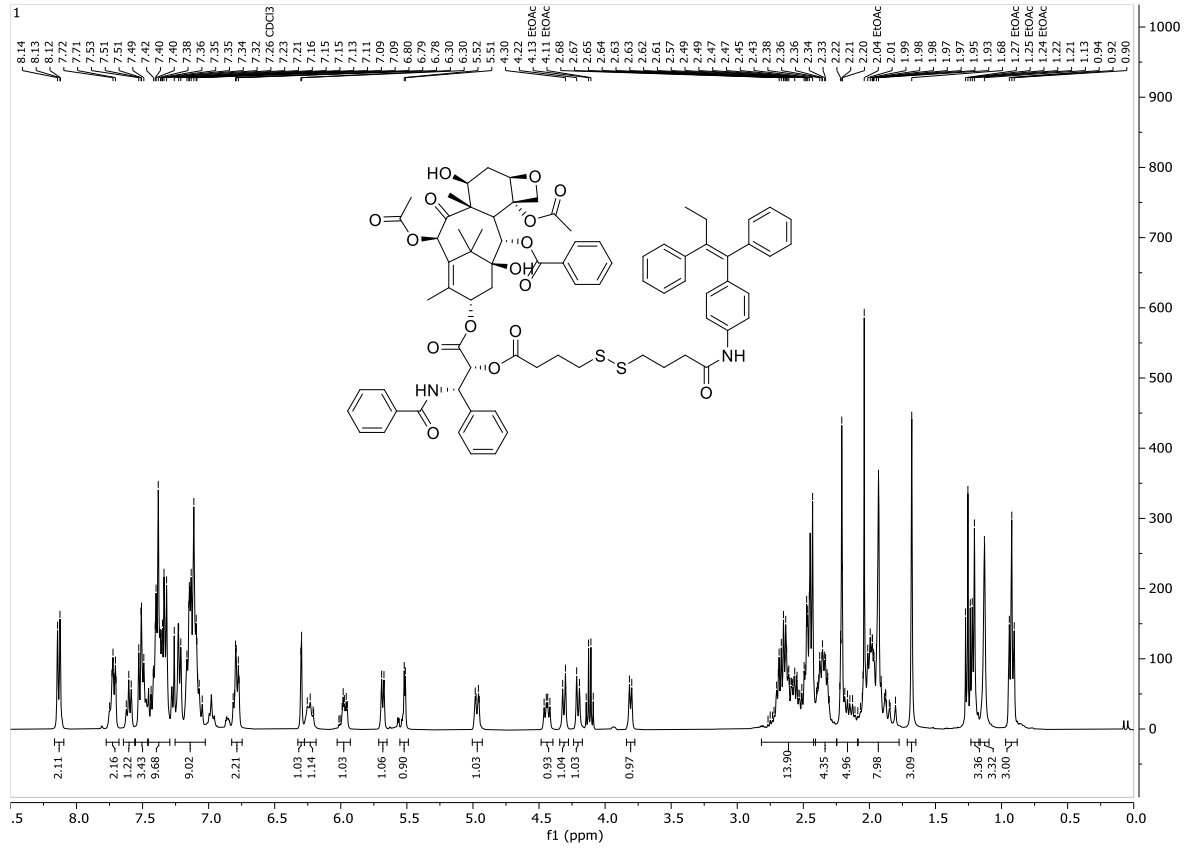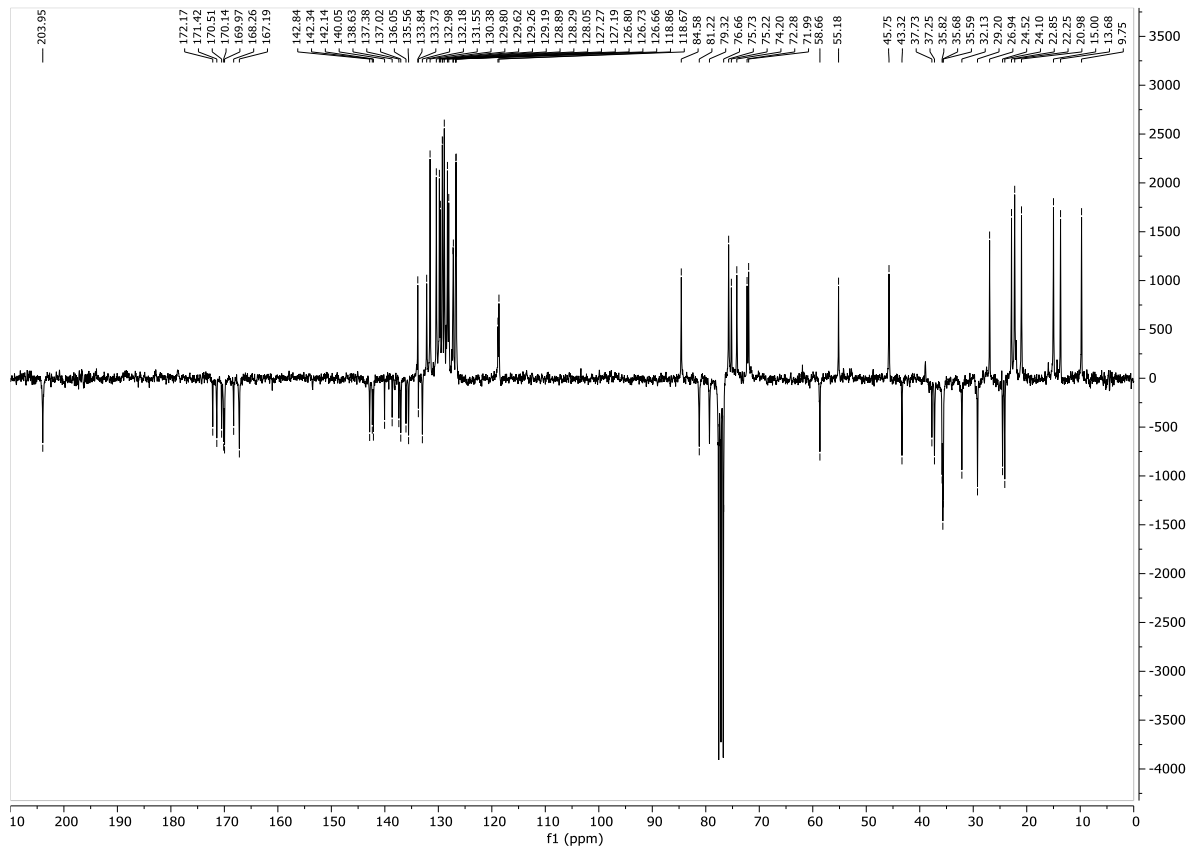

# <sup>1</sup>H NMR of 8

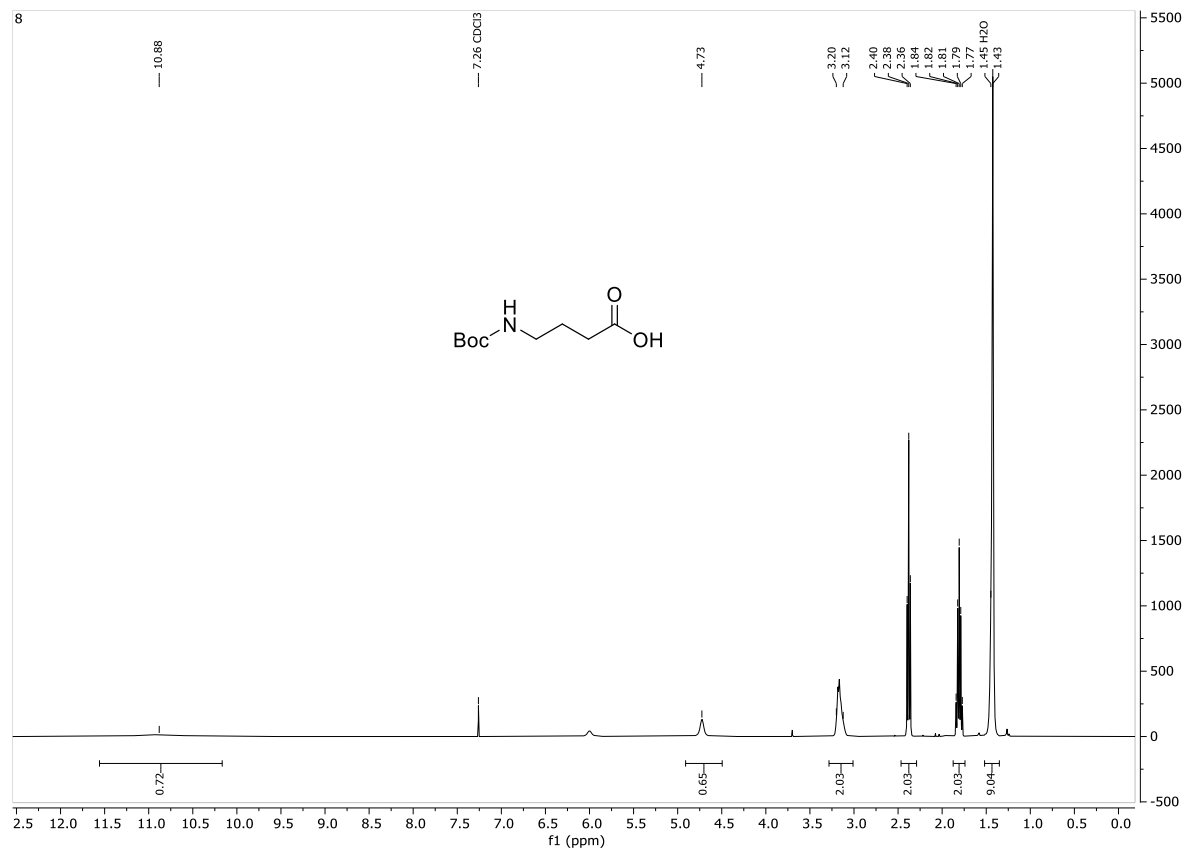

# <sup>1</sup>H and <sup>13</sup>C NMR of 9

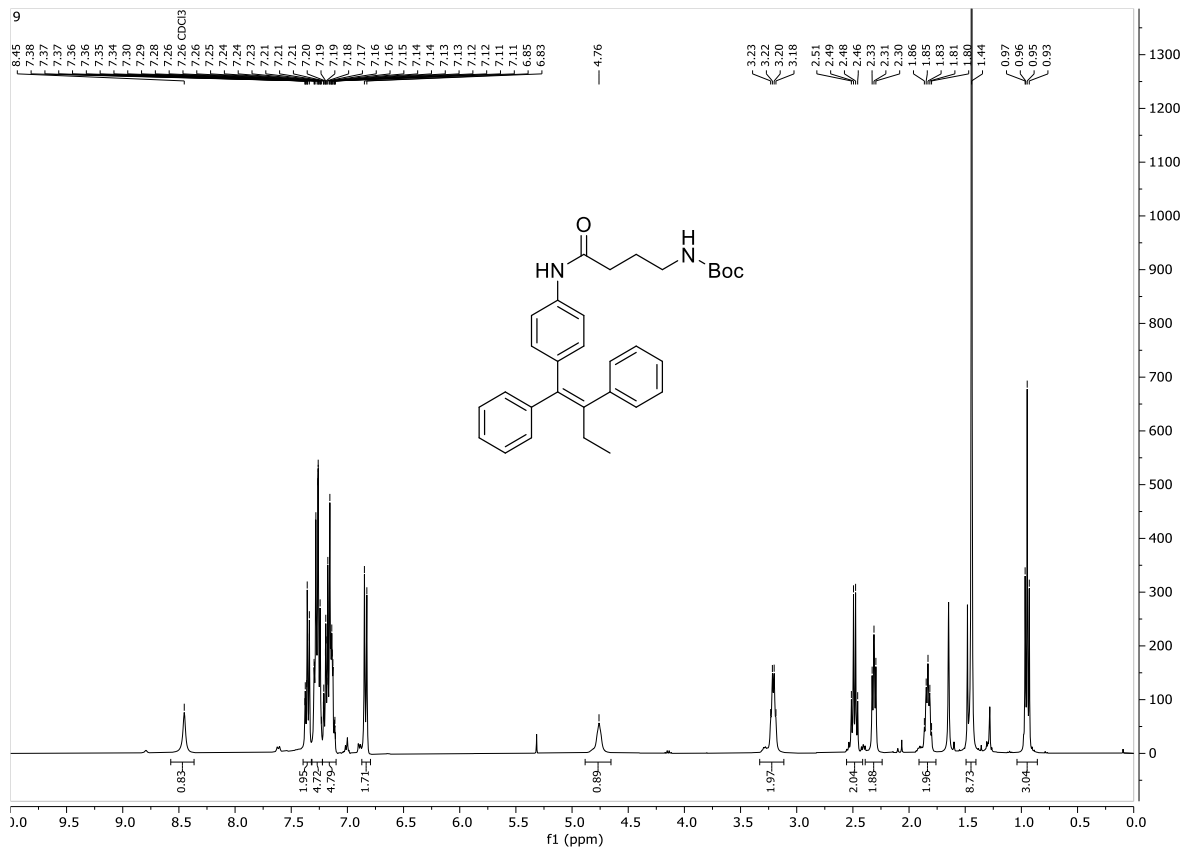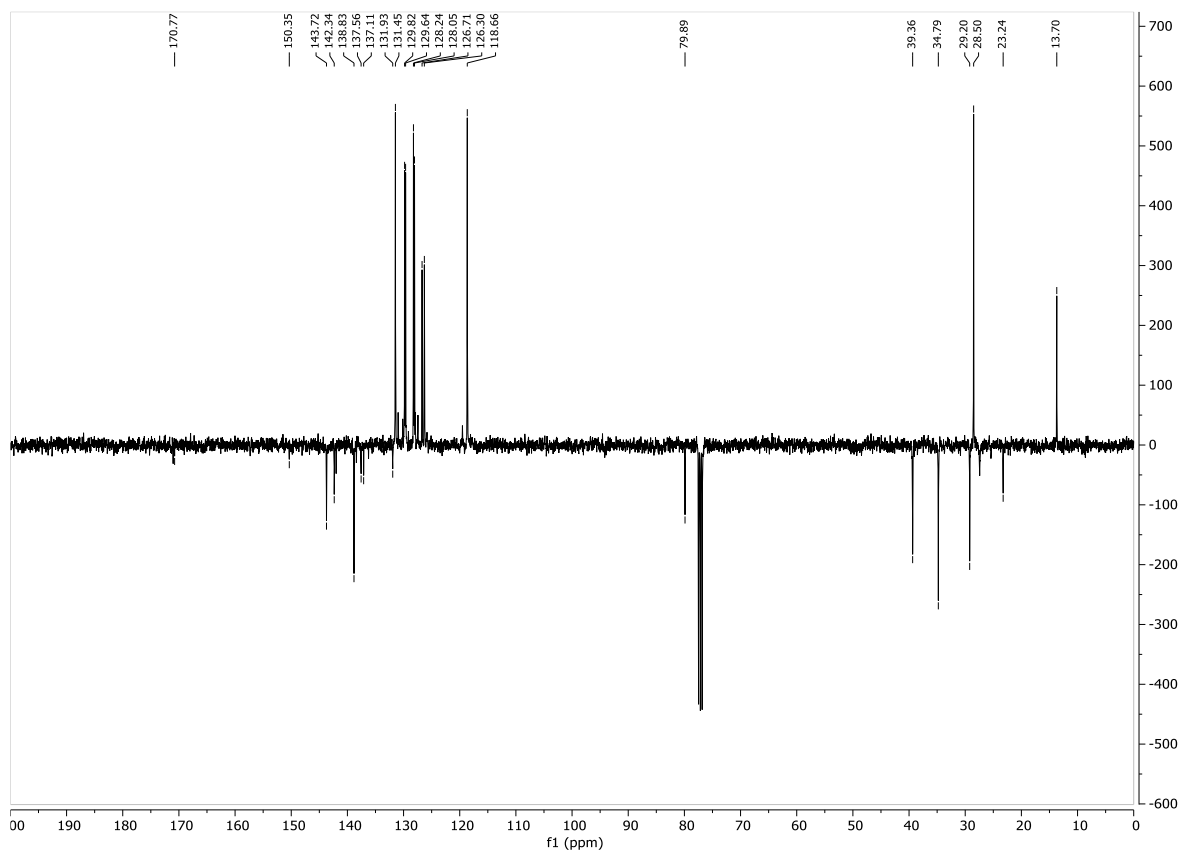

# <sup>1</sup>H and <sup>13</sup>C NMR of 10

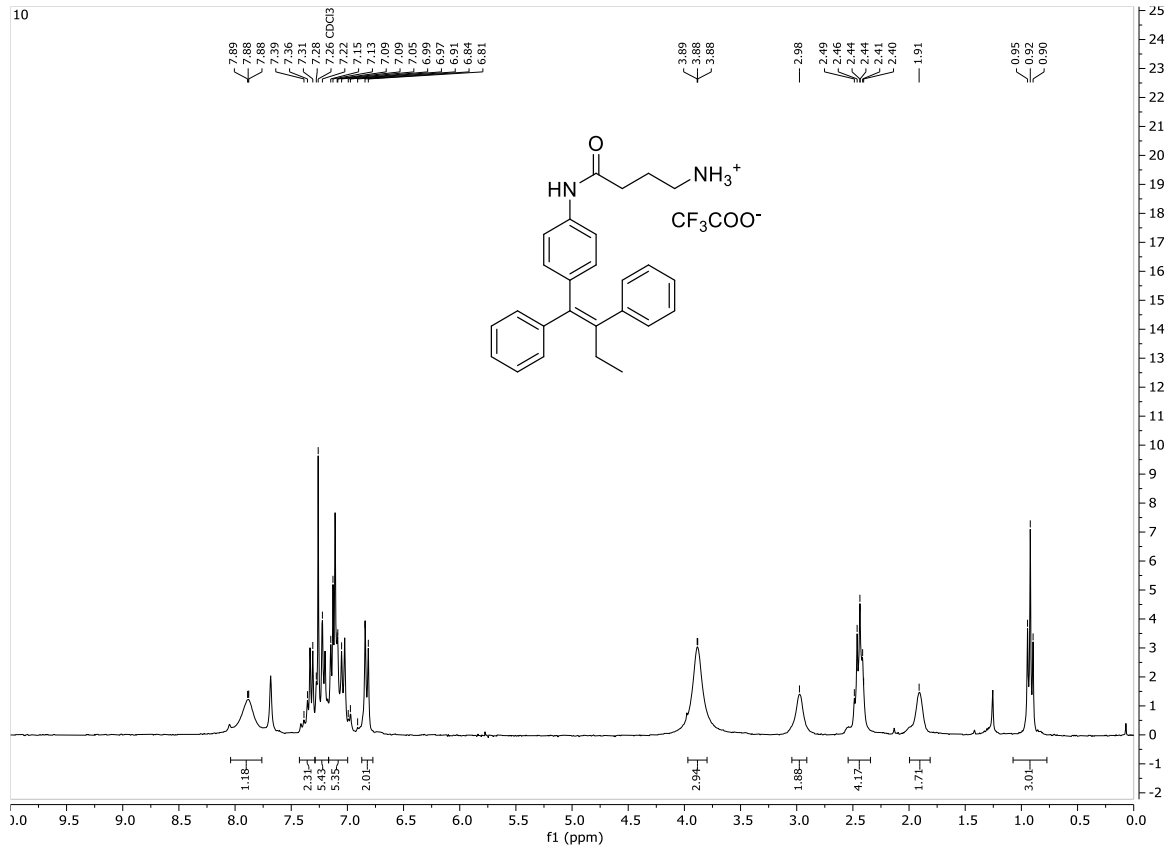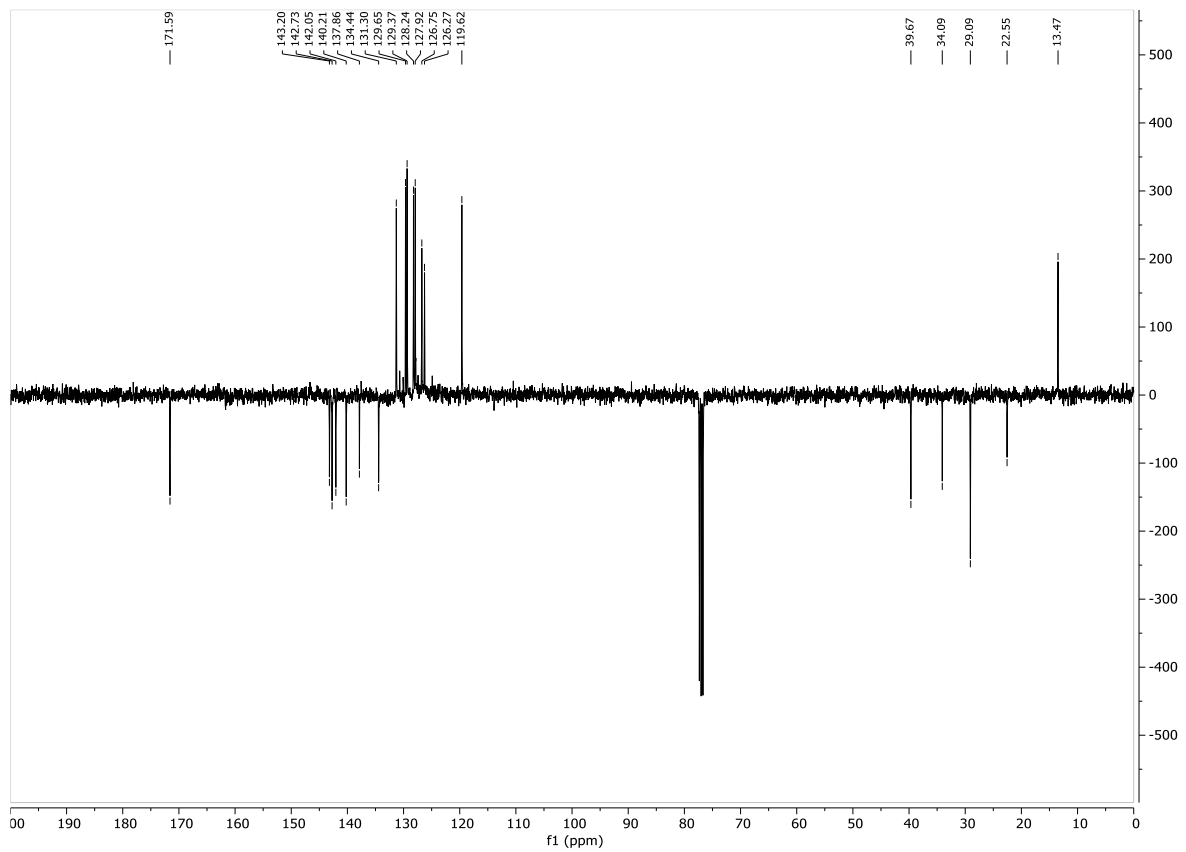



# <sup>1</sup>H and <sup>13</sup>C NMR of 11

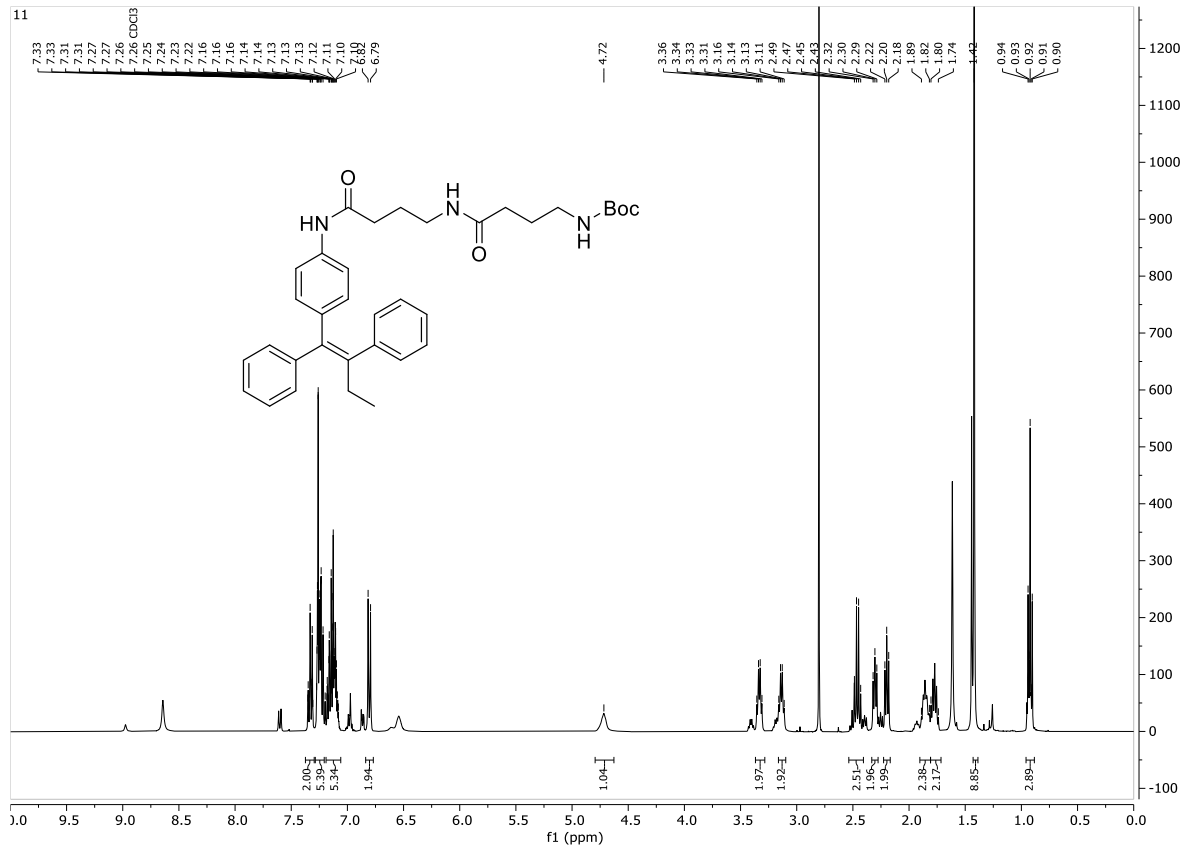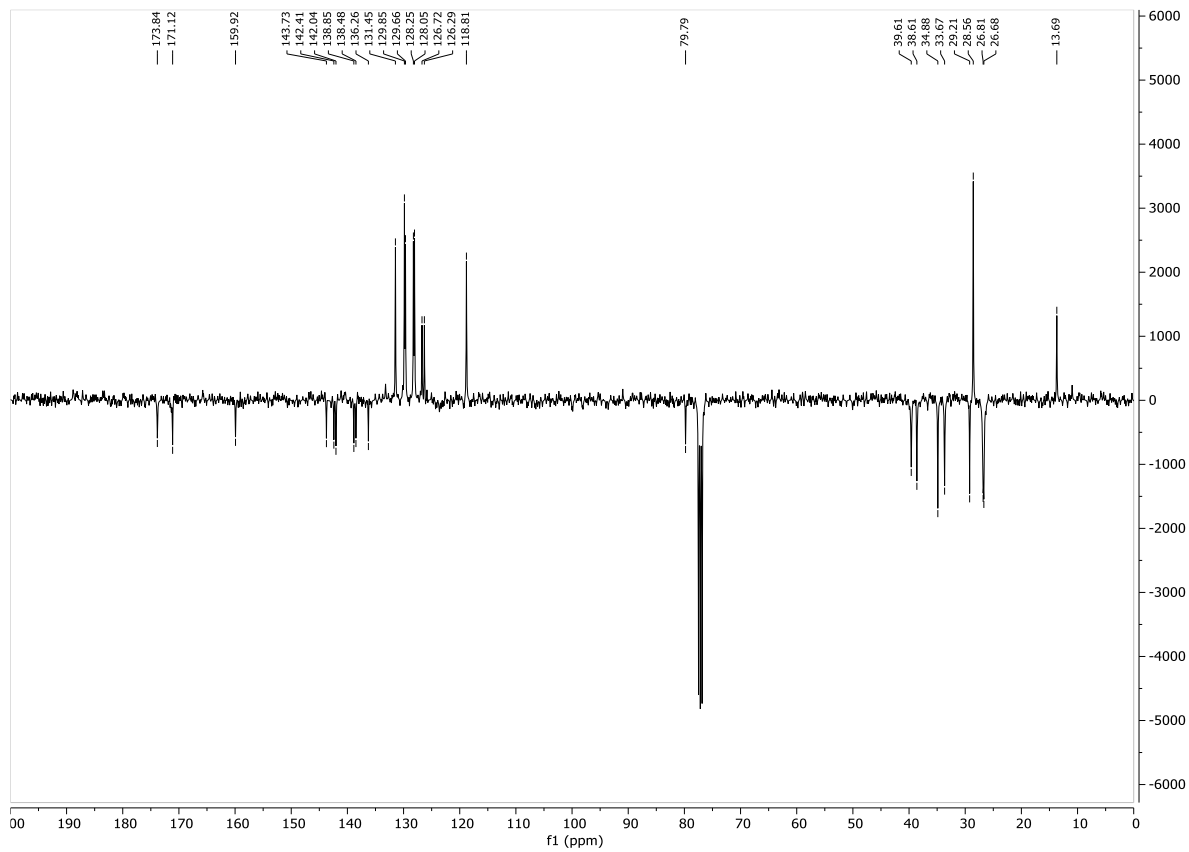

# <sup>1</sup>H and <sup>13</sup>C NMR of 12

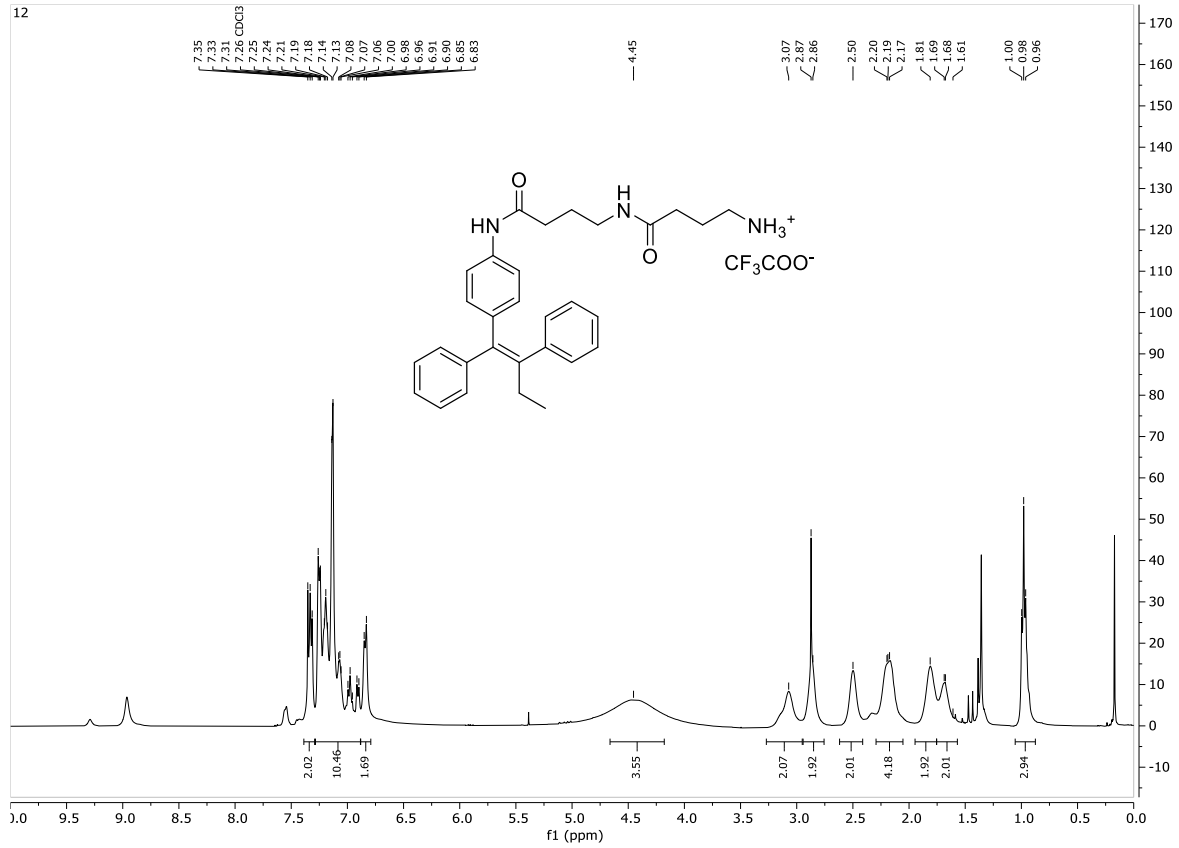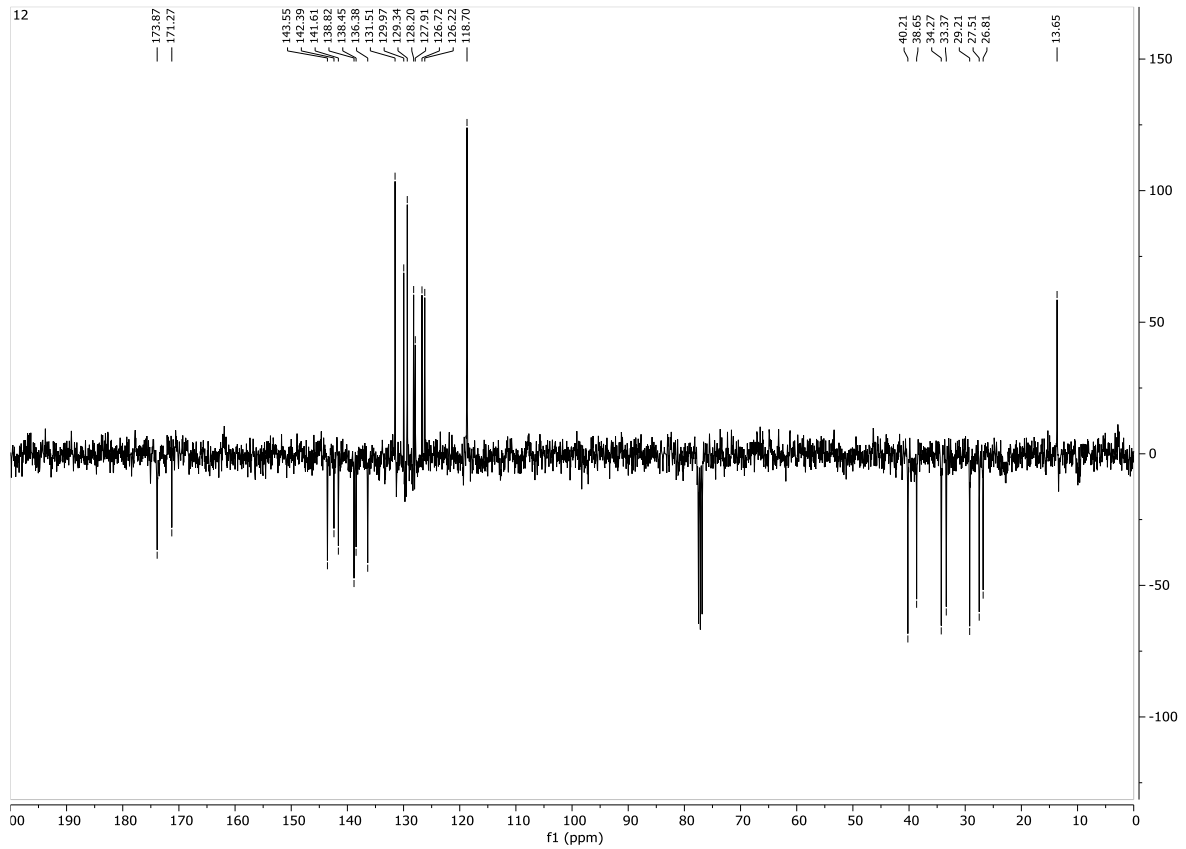

# <sup>1</sup>H NMR of 21

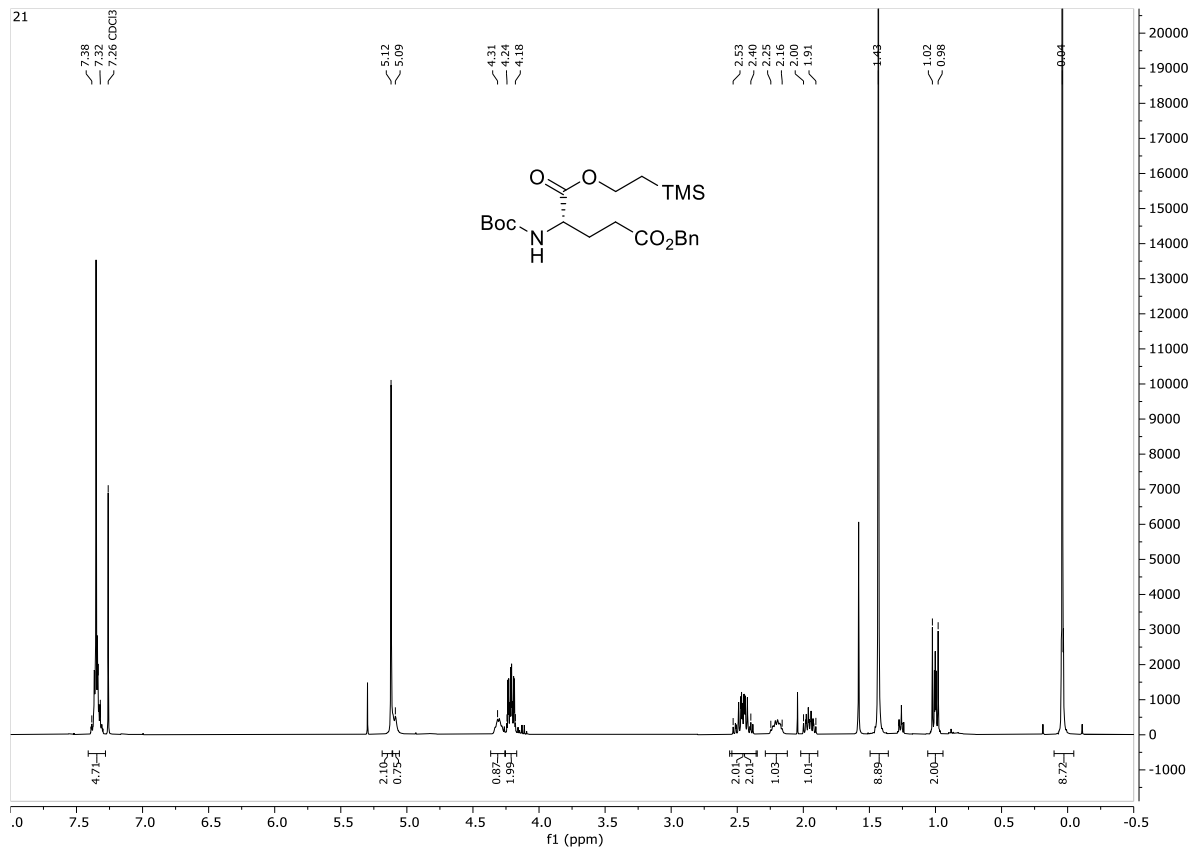

# <sup>1</sup>H NMR of 22

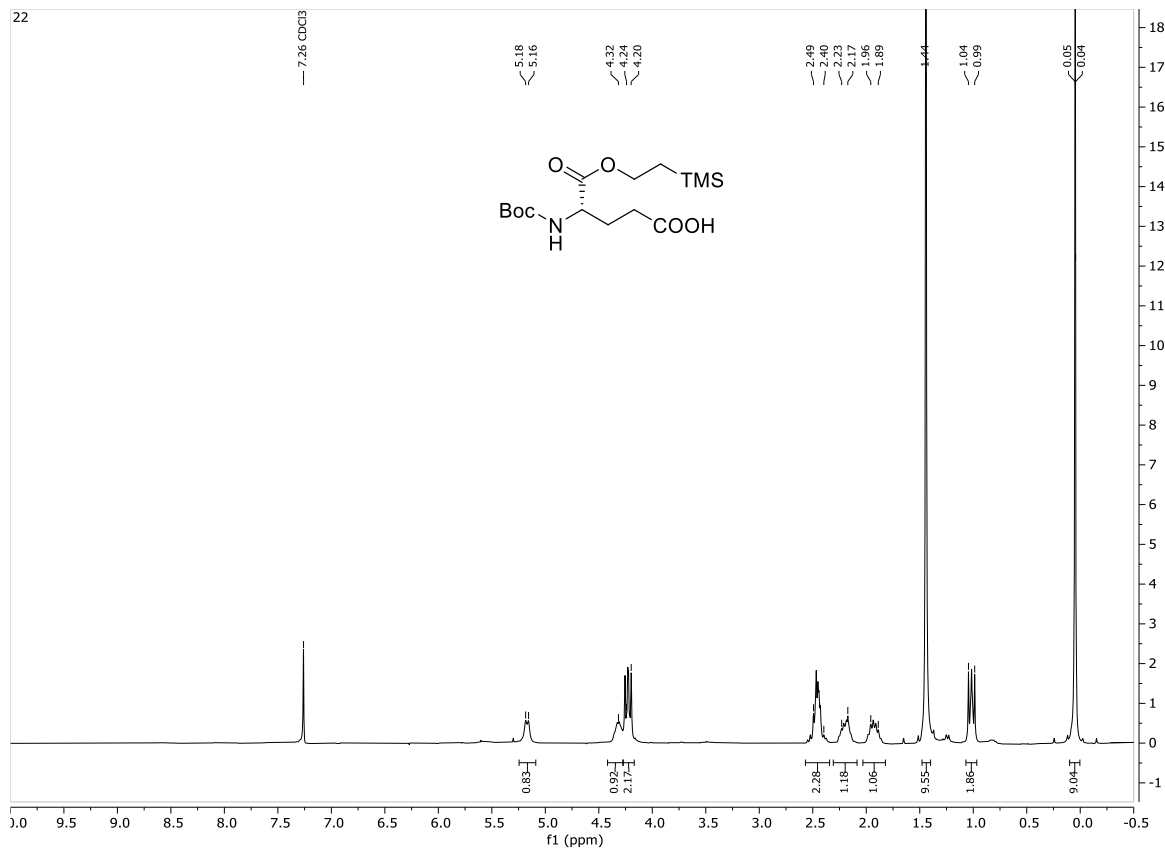

### <sup>1</sup>H NMR of 18

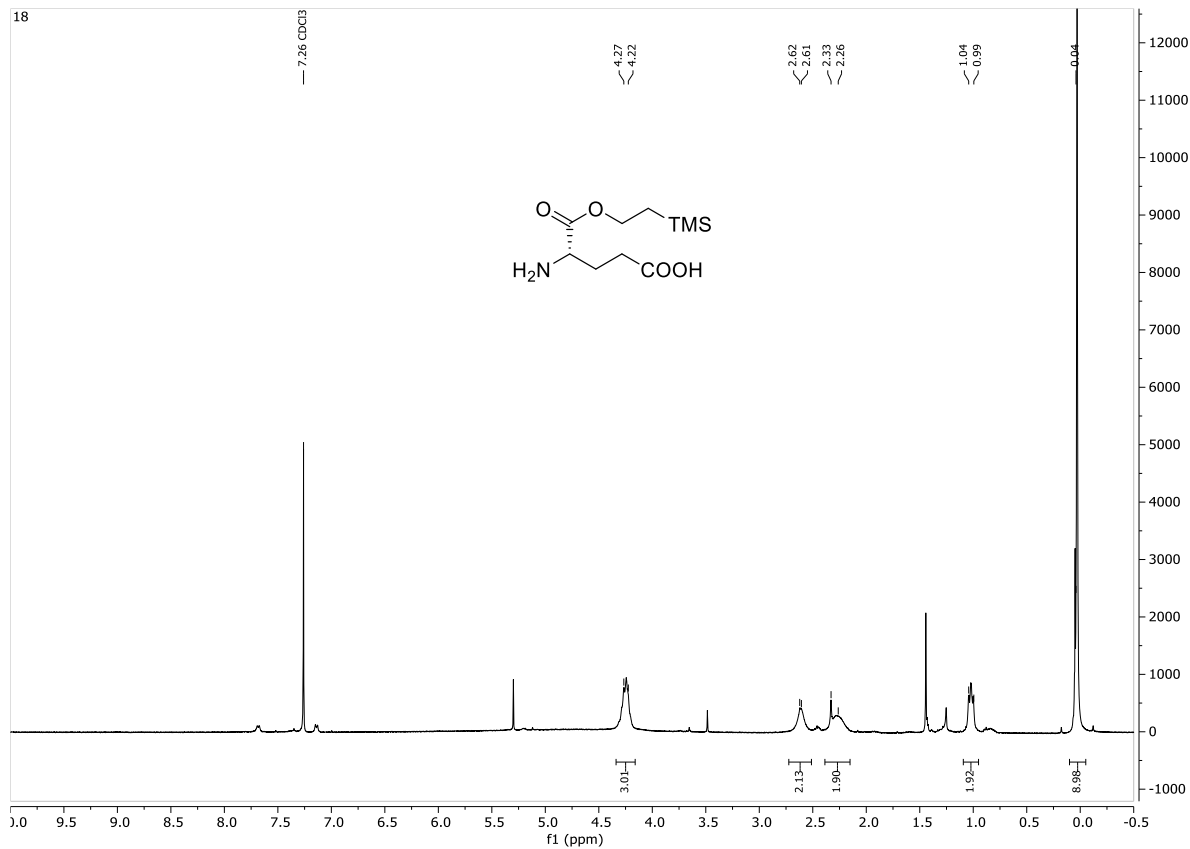

### <sup>1</sup>H NMR of 17

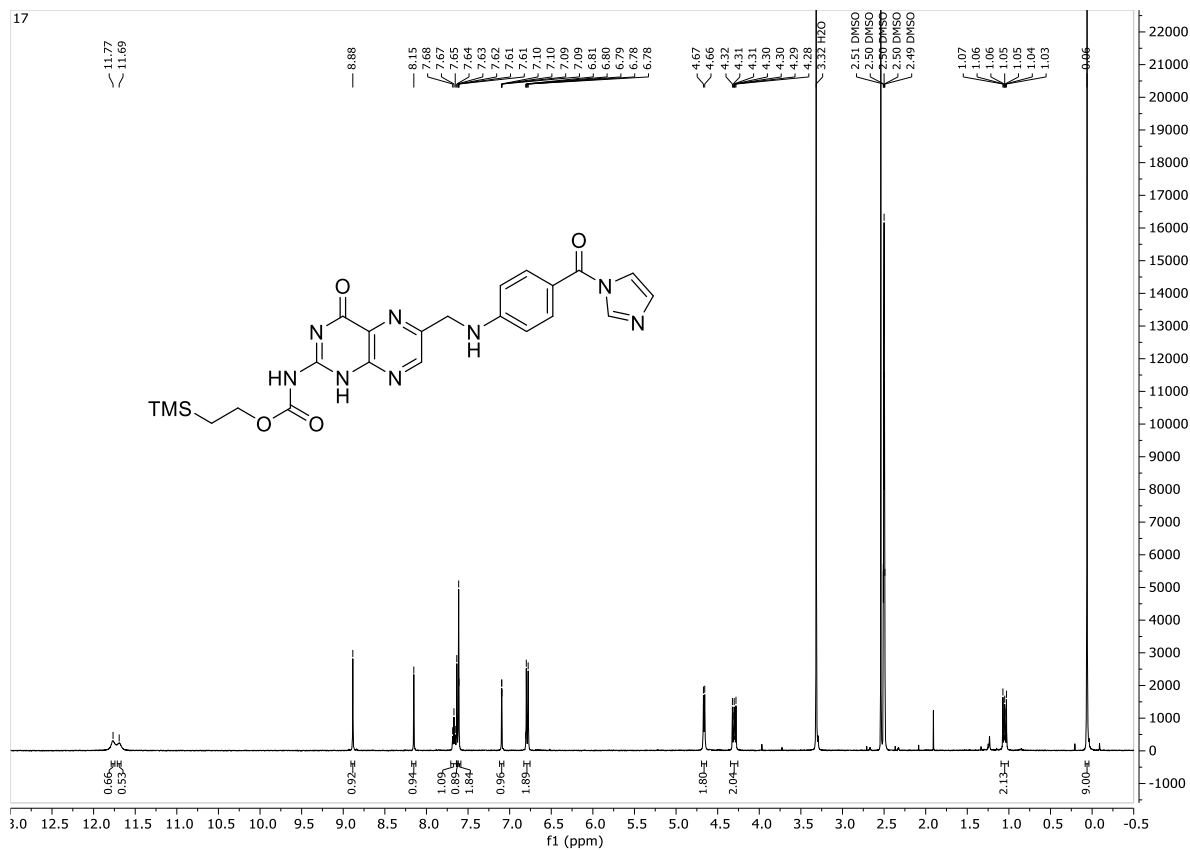

# <sup>1</sup>H NMR of 16

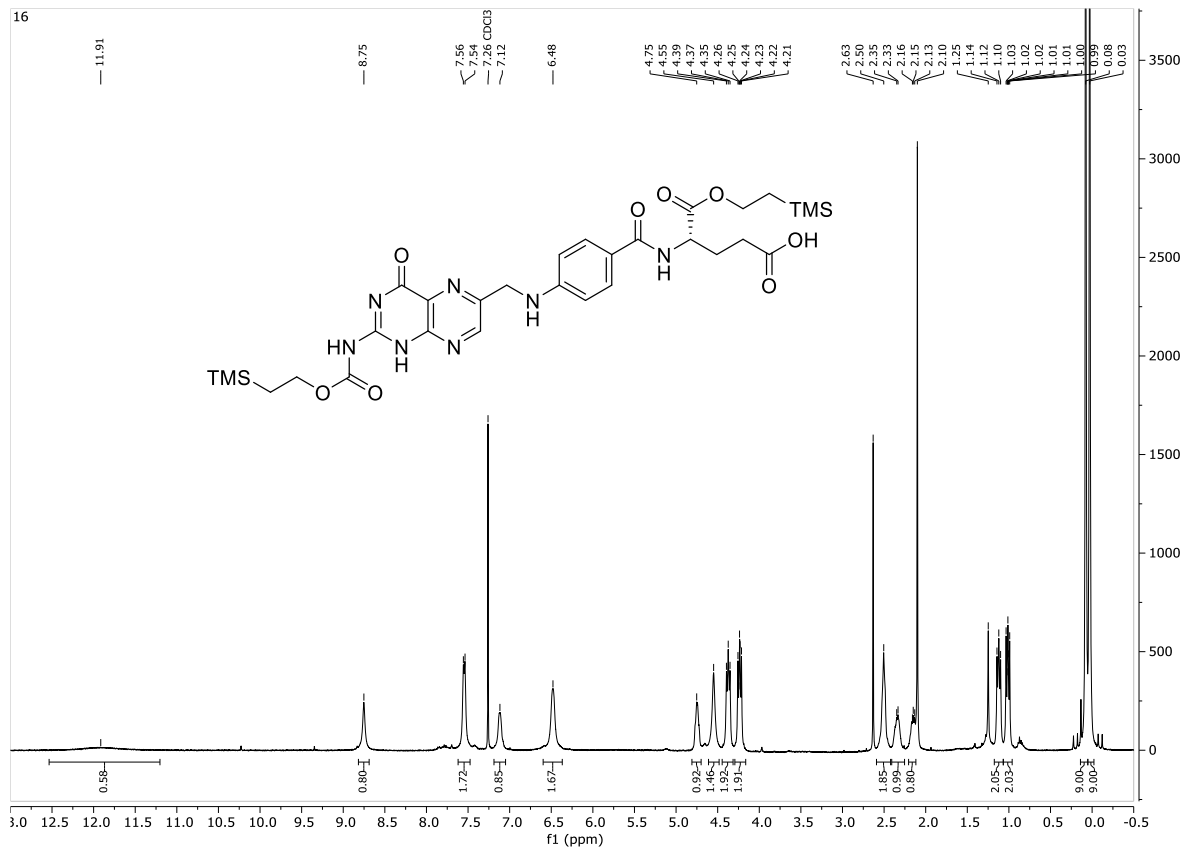

# <sup>1</sup>H NMR of 15

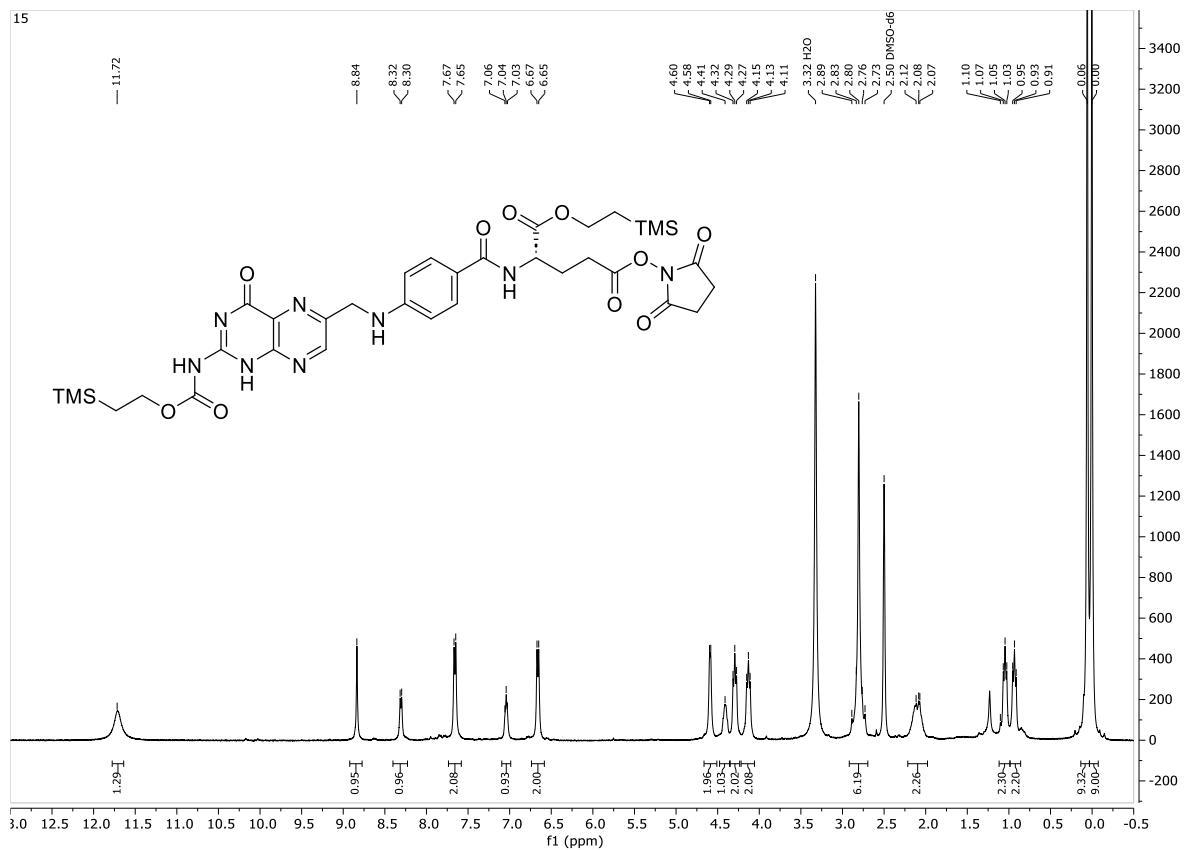

# <sup>1</sup>H and <sup>13</sup>C NMR of 14

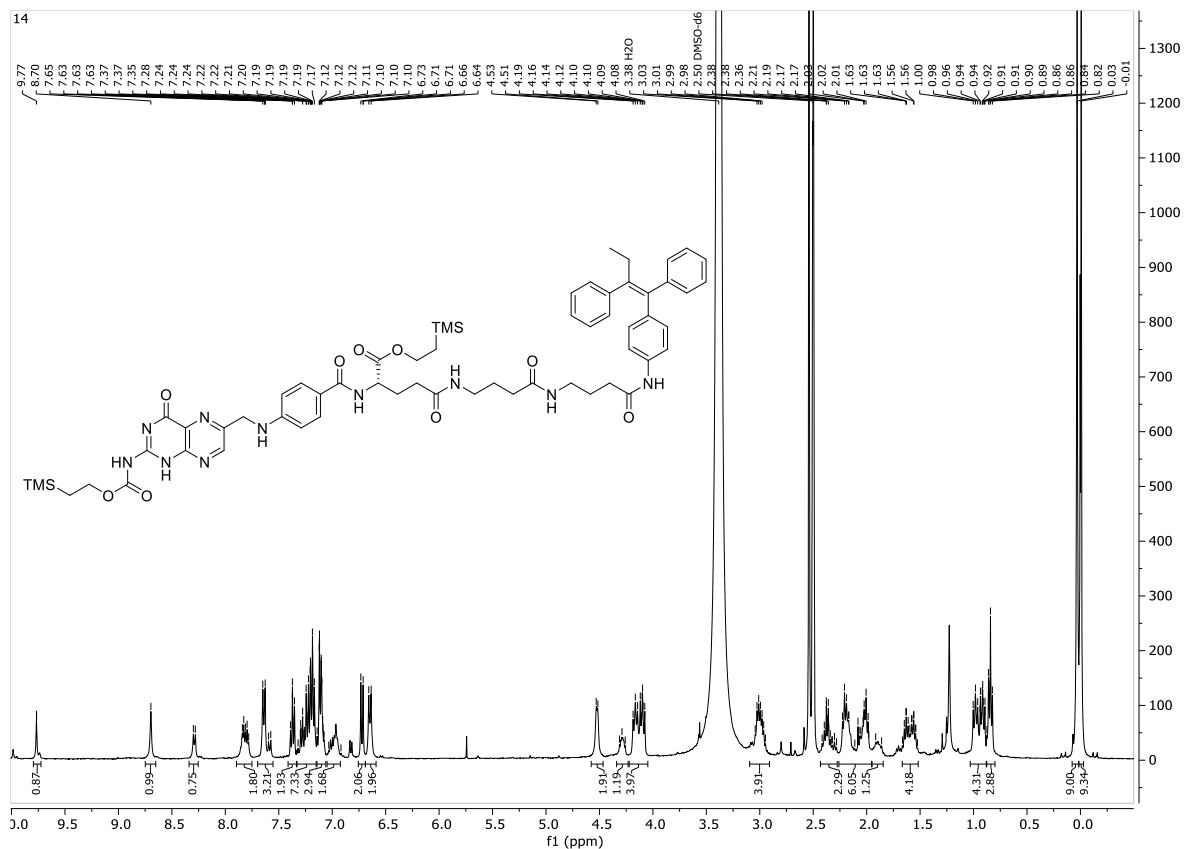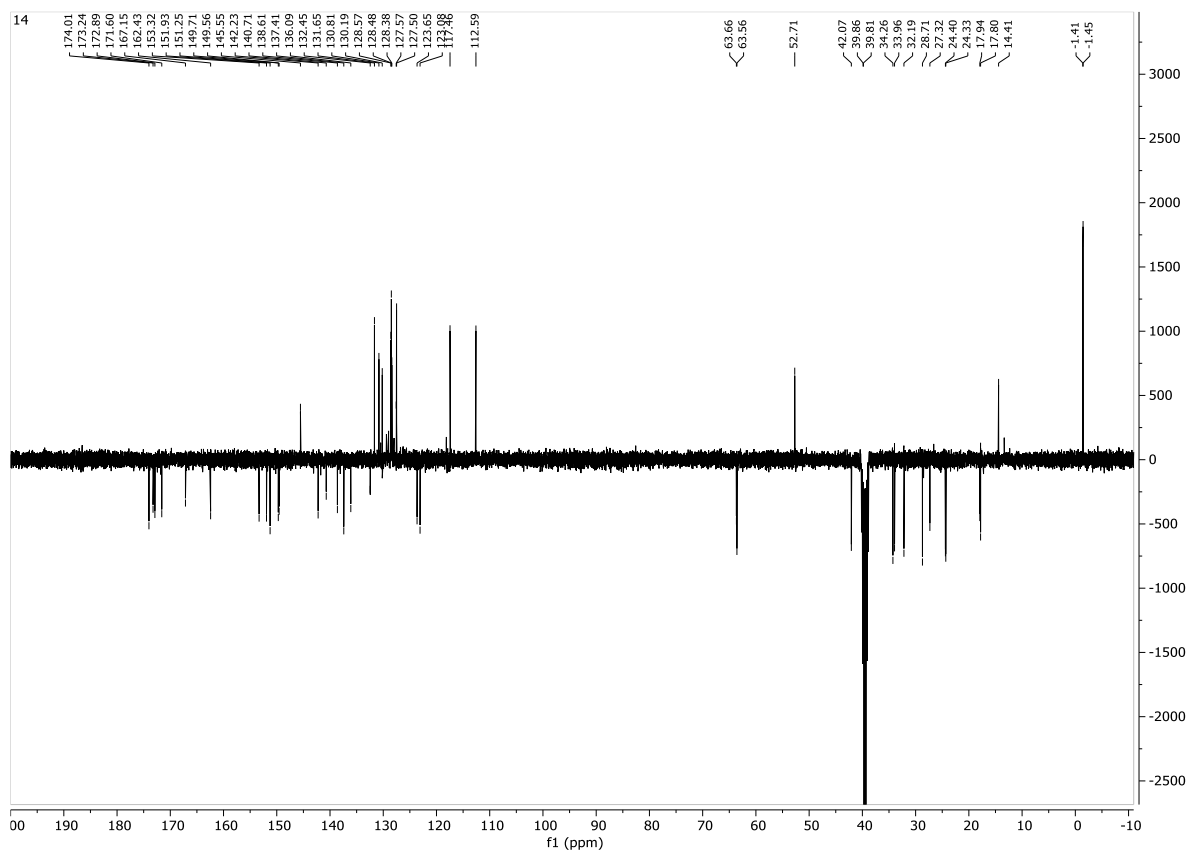

# <sup>1</sup>H and <sup>13</sup>C NMR of 2

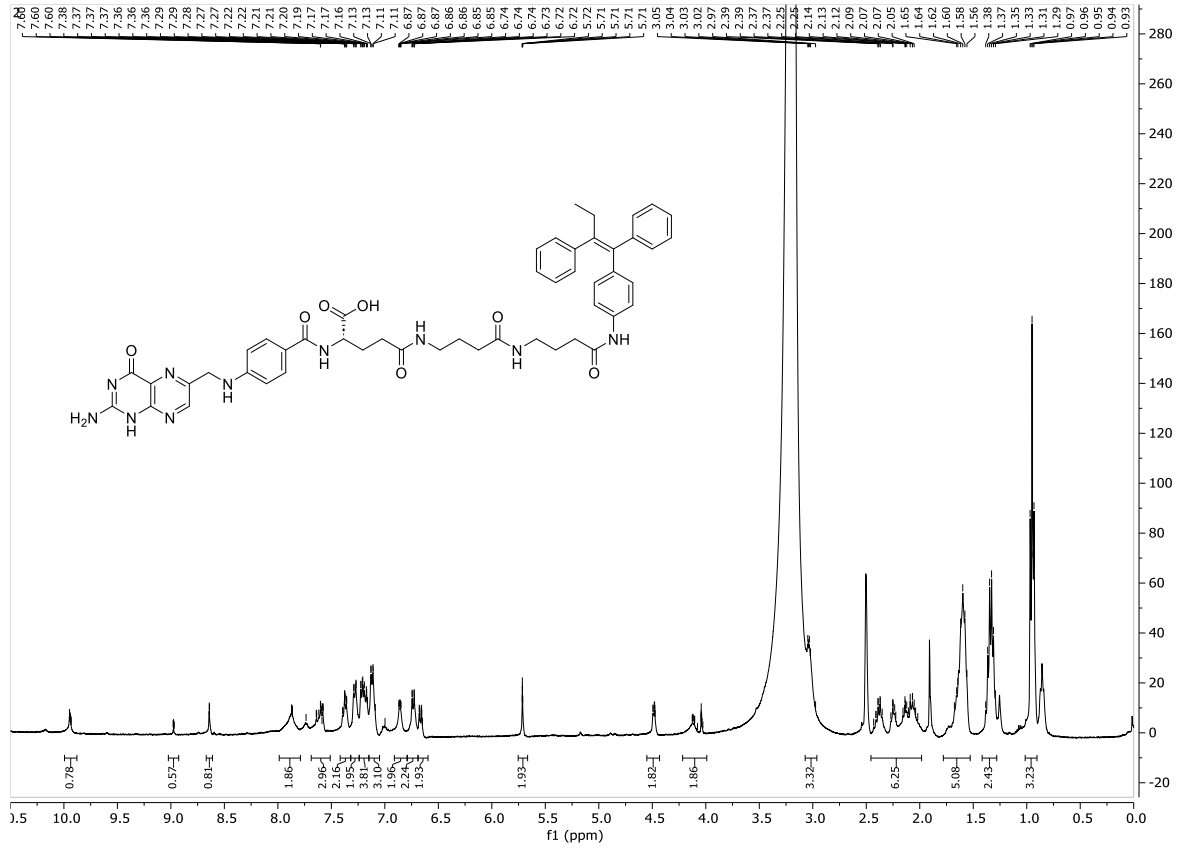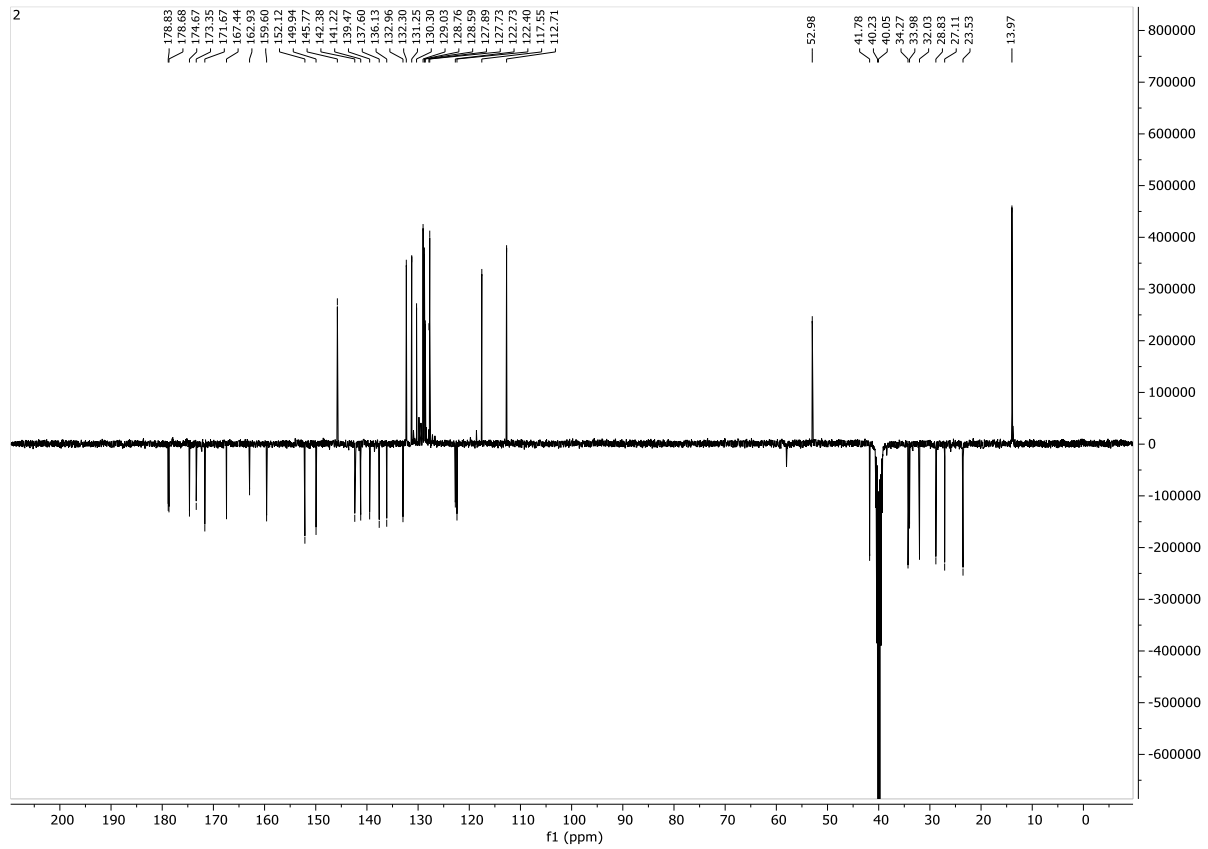

Supplement: d2ra06306a1.pdf [file d2ra06306a1.pdf]
